# Supplementary material
Source: PubMed Central journal article supplement (PMC1863502)

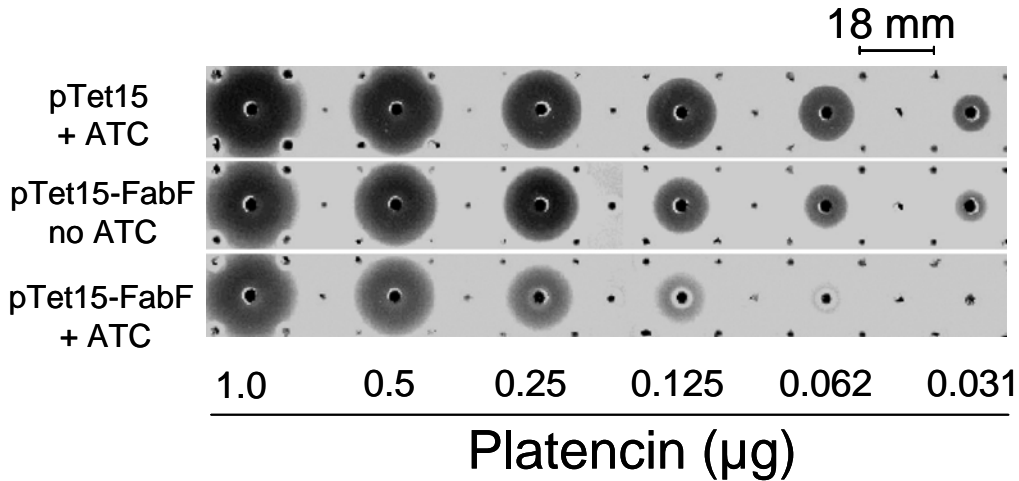

Supplement: pnas_0700746104_1.pdf [file pnas_0700746104_1.pdf]
